# Supplementary material
Source: publisher site journal article supplement (http://www.dovepress.com/get_supplementary_file.php?f=252195.docx)
Supplement: Supplementary file 1 [file get_supplementary_file.php]

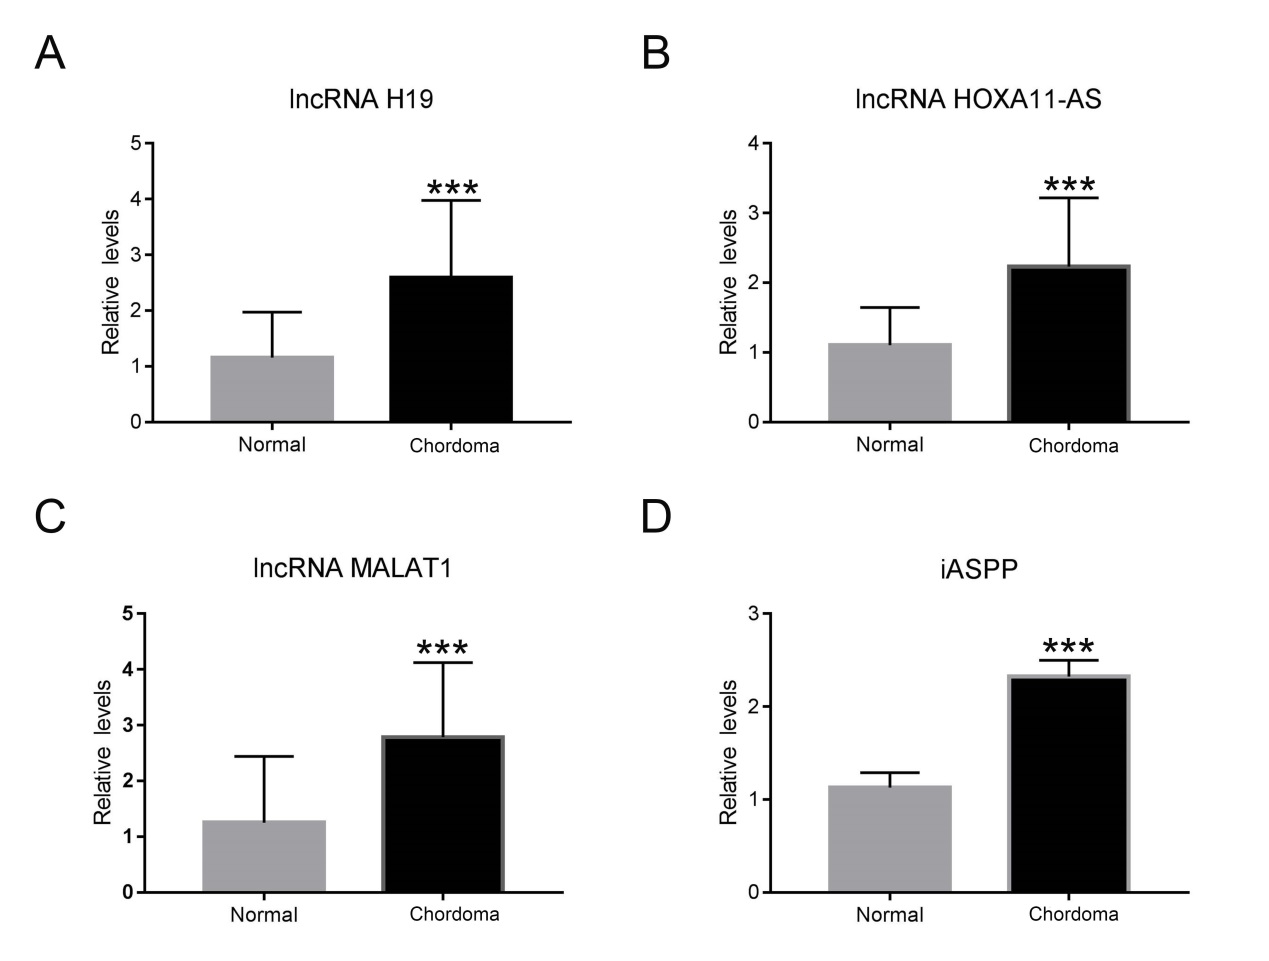


Figure S1: Expression of lncRNA H19 (A), lncRNA HOXA11-AS (B), lncRNA MALAT1 (C) and iASPP (D) was upregulated in human chordoma tissues, *** *p* < 0.001 vs Normal.


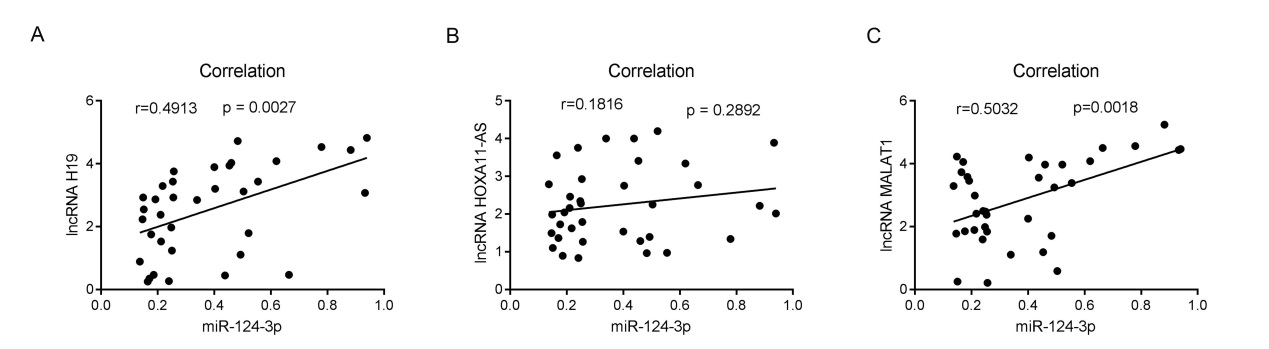


Figure S2: Correlation analysis between lncRNA (H19 (A), HOXA11-AS (B) and MALAT1(C)) and miR-124-3p in human chordoma tissues.
